1 **DISCOMARK: Nuclear marker discovery from orthologous**  
2 **sequences using draft genome data**

3 Sereina Rutschmann\*<sup>1,2,3</sup>, Harald Detering\*<sup>1,2,3</sup>, Sabrina Simon<sup>4,5</sup>, Jakob Fredslund<sup>6</sup>, Michael  
4 T. Monaghan<sup>1,2</sup>

5 **Addresses:**

6 <sup>1</sup>*Leibniz-Institute of Freshwater Ecology and Inland Fisheries (IGB), Müggelseedamm 301,*  
7 *12587 Berlin, Germany*

8 <sup>2</sup>*Berlin Center for Genomics in Biodiversity Research, Königin-Luise-Straße 6-8, 14195*  
9 *Berlin, Germany*

10 <sup>3</sup>*Department of Biochemistry, Genetics and Immunology, University of Vigo, 36310 Vigo,*  
11 *Spain*

12 <sup>4</sup>*Sackler Institute for Comparative Genomics, American Museum of Natural History, Central*  
13 *Park West and 79<sup>th</sup> St., New York, NY 10024, USA*

14 <sup>5</sup>*Biosystematics Group, Wageningen University, Droevendaalsesteeg 1, 6708 PB*  
15 *Wageningen, The Netherlands*

16 <sup>6</sup>*Alexandra Institute, Åbogade 34, 8200 Aarhus, Denmark*

17 **Keywords:**

18 marker discovery, mayfly, non-model organism, primer design, phylogenetics

19 **Correspondence:**

20 Sereina Rutschmann, Phylogenomics Lab, Department of Biochemistry, Genetics and  
21 Immunology, University of Vigo, 36310 Vigo, Spain. E-Mail:  
22 [sereina.rutschmann@gmail.com](mailto:sereina.rutschmann@gmail.com)

23 [\\* these authors contributed equally](#)

24 **Running title:**

25 DISCOMARK - Phylogenetic marker development

## 26 **Abstract**

27 High-throughput sequencing has laid the foundation for fast and cost-effective development  
28 of phylogenetic markers. Here we present the program DISCOMARK, which streamlines the  
29 development of nuclear DNA (nDNA) markers from whole-genome (or whole-transcriptome)  
30 sequencing data, combining local alignment, alignment trimming, reference mapping and  
31 primer design based on multiple sequence alignments in order to design primer pairs from  
32 input orthologous sequences. In order to demonstrate the suitability of DISCOMARK we  
33 designed markers for two groups of species, one consisting of closely related species and one  
34 group of distantly related species. For the closely related members of the species complex of  
35 *Cloeon dipterum* s.l. (Insecta, Ephemeroptera), the program discovered a total of 78 markers.  
36 Among these, we selected eight markers for amplification and Sanger sequencing. The exon  
37 sequence alignments (2,526 base pairs (bp)) were used to reconstruct a well supported  
38 phylogeny and to infer clearly structured haplotype networks. For the distantly related species  
39 we designed primers for several families in the insect order Ephemeroptera, using available  
40 genomic data from four sequenced species. We developed primer pairs for 23 markers that are  
41 designed to amplify across several families. The DISCOMARK program will enhance the  
42 development of new nDNA markers by providing a streamlined, automated approach to  
43 perform genome-scale scans for phylogenetic markers. The program is written in Python,  
44 released under a public license (GNU GPL v2), and together with a manual and example data  
45 set available at: <https://github.com/hdetering/discomark>.

## 46 **Introduction**

47 The inference of phylogenetic relationships has benefited profoundly from the availability of  
48 nuclear DNA (nDNA) sequences for an increasing number of organism groups. The  
49 development of new phylogenetic markers has provided unprecedented insight into the  
50 evolutionary relationships of non-model organisms in particular (Ellegren 2014). Large sets of  
51 nDNA markers (single copy genes) have recently been designed for taxonomic groups for  
52 which genomic resources were available, e.g. cichlid fish (Meyer *et al.* 2015), ray-finned fish  
53 (Near *et al.* 2012), reptiles (Ruane *et al.* 2014), birds (Kerr *et al.* 2014) and flowering plants  
54 (Zeng *et al.* 2014). However, for many taxonomic groups there are only a handful of nDNA  
55 markers available that are suitable for phylogenetic reconstruction. Other approaches, such as  
56 ultra-conserved element (UCE) sequencing (Faircloth *et al.* 2012), anchored hybrid  
57 enrichment (Lemmon and Lemmon 2012), restriction site-associated DNA (RAD) sequencing  
58 (Baird *et al.* 2008) or genotyping by sequencing (GBS, Elshire *et al.* 2011) have become  
59 popular for addressing specific questions in systematics or population genetics; however,  
60 these methods are still cost-intensive, require a comparatively high amount of starting DNA  
61 material and can depend on the availability of reference genomes (e.g. anchored hybrid  
62 enrichment). Consequently, standard Sanger sequencing approaches are still in high demand  
63 for various research questions.

64 Identification of novel phylogenetic markers has been a predominantly manual process,  
65 which impedes their large-scale development, and comprehensive primer design based on  
66 large sets of multiple sequence alignments remains challenging. Existing tools can generally  
67 be classified into those developed for primer design or for marker discovery. Primer design  
68 tools can design primer pairs for single loci (e.g. GEMI, Sobhy *et al.* 2012; PRIMER3,  
69 Untergasser *et al.* 2012; CEMASUITE, Lane *et al.* 2015) or multiple loci at once

70 (BATCHPRIMER3, You *et al.* 2008; PRIMERVIEW, O'Halloran 2015). Some programs are  
71 specific for highly variable DNA targets (PRIMERDESIGN, Brodin *et al.* 2013; PRIMERDESIGN-  
72 M, Yoon and Leitner 2015), viral genomes (PRISM, Yu *et al.* 2015), and transcriptome input  
73 data (SCRIMER, Morkovsky *et al.* 2015). Marker discovery tools target single nucleotide  
74 polymorphism (SNP) markers in polyploid organisms (POLYMARKER, Ramirez-Gonzalez *et*  
75 *al.* 2015), and putative single copy loci from plant transcriptomes (MARKERMINER, Chamala  
76 *et al.* 2015). The challenge of developing new phylogenetic markers lies both in the discovery  
77 of conserved regions, the design of primer pairs and an estimation of the level of their  
78 phylogenetic signal.

79 Here we present DISCOMARK (=Discovery of Markers), a flexible, user-friendly program  
80 that identifies conserved regions and designs primers based on multiple sequence alignments  
81 taken from FASTA-formatted files of putative orthologous sequences from whole-genome or  
82 whole-transcriptome data. The program can be used to easily screen for phylogenetically  
83 suitable nDNA markers and to design primers that can be used for Sanger sequencing as well  
84 as high-throughput sequencing. The program is structured into several steps that can be  
85 individually optimized by the user and run independently. In terms of input, the program can  
86 be applied on large and small sets of taxa, including both closely and distantly related species.  
87 Ideally, orthologous sequences in combination with a whole-genome reference sequence are  
88 used. Thus, exon/intron boundaries can be inferred using the reference for each marker. Under  
89 the default settings, the program will design several primer pairs that anneal in conserved  
90 regions. The visualization of the alignments with potential primers allows the user to choose  
91 between primers targeting exons or introns (e.g. exon-primed intron-crossing (EPIC)  
92 markers). Additionally, information about the suitability as phylogenetic markers is provided  
93 by an estimate of the number of SNPs per marker and the applicability across species. Finally,

94 we demonstrate the utility of DISCOMARK for (1) closely related species (i.e. *Cloeon dipterum*  
95 s.l. species complex) using whole-genome data, and (2) distantly related species (i.e. insect  
96 order Ephemeroptera) using whole-genome data derived from genome sequencing projects. In  
97 order to generate genomic reference sequences we used draft whole genome sequencing at  
98 shallow coverage followed by draft genome assembly. In one scenario (*C. dipterum* s.l.  
99 species complex) we demonstrate that incomplete genomic data can be used for ortholog  
100 prediction and primer design as well.

## 101 **Materials and Methods**

### 102 *DISCOMARK implementation*

103 The program DISCOMARK is written in Python and was developed to design primer pairs in  
104 conserved regions of predicted orthologous genes. Orthologs are required for phylogenetic  
105 studies. The ortholog identification step is not part of the DISCOMARK workflow but  
106 DISCOMARK is designed to directly work with the output of several ortholog prediction  
107 programs, e.g. HAMSTR (Ebersberger *et al.* 2009), or Orthograph  
108 (<https://github.com/mptksen/Orthograph>, last accessed March 25, 2016). Orthologous groups  
109 may be derived from genome or transcriptome sequence data. In addition to the orthologous  
110 genes, genomic data such as whole-genome sequencing data can be provided to DISCOMARK  
111 as a guide to detect exon/intron boundaries. DISCOMARK performs seven steps, combining  
112 Python scripts with widely used bioinformatics programs (Fig. 1). The steps: (1) combine  
113 orthologous groups of sequences, (2) align sequences of each orthologous group using  
114 MAFFT v.7.205 (Katoh and Standley 2013), (3) trim sequence alignments with TRIMAL v.1.4  
115 (Capella-Gutierrez *et al.* 2009), (4) align sequences against a reference (e.g. whole-genome  
116 dataset from the same or closely related taxa) with BLASTN v.2.2.29 (Altschul *et al.* 1997;

117 Camacho *et al.* 2009) and re-alignment using MAFFT, (5) design primer pairs on single-gene  
118 alignments using a modified version of PRIFi (Fredslund *et al.* 2005), adapted by us into a  
119 Python package that uses BioPython v.1.65 and Python v.3.4.3, (6) check primer specificity  
120 with BLASTN, and (7) generate output in several formats (visual HTML report, tabular data  
121 and FASTA files of the primers). The results of each step can be inspected in the respective  
122 output folders.

123 *1. Combine sequences.* In the first step, the putative orthologous sequences of different taxa  
124 are combined according to the orthologous groups. The input files are expected to be  
125 nucleotide sequences in FASTA format. We recommend using putative orthologous exon  
126 sequences (e.g. CDS) in combination with whole-genome data (e.g. a draft genome  
127 assembly). Each input file is expected to contain the sequences of one orthologous group;  
128 orthologs of each input taxon are to be organized into a taxon folder. Importantly, file names  
129 represent the ortholog identifiers used to combine orthologous sequences of the various input  
130 taxa; by default, ortholog prediction tools follow that convention.

131 *2. Align sequences.* Orthologous sequences combined according to the orthologous groups are  
132 separately aligned with the multiple sequence alignment (MSA) program MAFFT. Alignment  
133 parameters can be specified by the user via a configuration file (discomark.conf, located in the  
134 program folder). Default parameters are the following: ‘--localpair --maxiterate 16 --  
135 inputorder --preserve-case --quiet’ (L-INS-i alignment method). We chose MAFFT as multiple  
136 alignment tool because it combines accuracy and efficiency and has been adopted widely in  
137 the scientific community (Pais *et al.* 2014; Szitenberg *et al.* 2015).

138 *3. Trim alignments.* In order to remove poorly aligned regions, sequence alignments are  
139 trimmed using TRIMAL. The program TRIMAL analyzes the distribution of gaps and

140 mismatches in the alignment and discard alignment positions and sequences of low quality.  
141 By default, DISCOMARK calls TRIMAL with the ‘-strictplus’ method. The preset is used by  
142 TRIMAL to derive the specific thresholds for alignment trimming (minimum gap score,  
143 minimum residue similarity score, conserved block size). Since alignment trimming largely  
144 depends on the input data and influences the downstream results, TRIMAL can also be run with  
145 different settings (e.g. ‘-gappyout’, ‘-strict’, ‘-automated1’; but see Capella-Gutierrez *et al.*  
146 (2009). Alternatively, there is also the option to deactivate the alignment trimming with the  
147 DISCOMARK option ‘--no-trim’ or use alternative trimming programs such as GBLOCKS  
148 (Castresana 2000; Talavera and Castresana 2007) or GUIDANCE2 (Landan and Graur 2008;  
149 Sela *et al.* 2015).

150 *4. Blast and alignment to reference.* In this step a genomic reference sequence for each input  
151 ortholog is identified and added to the trimmed alignment. This step is particularly important  
152 when working with coding sequences which do not contain intron sequences; thus, a genomic  
153 sequence is needed to infer intron/exon boundaries. Working with coding sequences is  
154 advisable for more distantly related taxa which may include intron length polymorphisms, or  
155 to target EPIC markers. Any whole-genome data set (from one of the included taxa or a  
156 closely related taxa) can be used as reference for mapping the ortholog sequences. Here,  
157 mapping means that the input sequences are compared to the reference sequences, which are  
158 defined by the user using the local alignment program BLASTN. The best locally aligning  
159 reference sequence (the one that yields the longest alignment among all input sequences) for  
160 each orthologous group is added to the corresponding sequence alignment. Reference  
161 sequences are cut to 100 base pairs (bp) upstream and downstream of the first, respectively  
162 last, BLAST hit to avoid alignment length inflation. Then, the extended alignments are re-  
163 aligned with MAFFT. Finally, the best BLAST hits of all sequences belonging to a marker are

164 compared and a ‘`uniq_ref`’ flag is set if they all map to the same reference sequence. The  
165 reference alignment step is optional; however, the inclusion of whole-genome data is essential  
166 for estimating intron/exon boundaries. Given that information, the focus of target sequences  
167 to be amplified can be on entire exon markers, EPIC markers, or a combination.

168 *5. Design primers.* The single-gene alignments, after trimming, mapping and re-aligning to a  
169 reference, are used as input to design primer pairs. We integrated the webtool PRiFi  
170 (<http://cgi-www.daimi.au.dk/cgi-chili/PriFi/main>, last accessed December 20, 2015) as a  
171 Python package that provides a comprehensive set of parameters. As default settings for  
172 DISCOMARK we chose the following: estimated product length between 200-1,000 bp  
173 (‘`OptimalProductLength = [400, 600, 800, 1000]`’, `MinProductLength = 200`,  
174 `MaxProductLength = 1000`’), maximum number of ambiguity positions within the primer  
175 sequences (‘`MaxMismatches = 2`’), primer length between 20-30 bp (‘`MinPrimerLength = 20`,  
176 `MaxPrimerLength = 30`, `OptimalPrimerLength = [20, 25]`’), melting temperature of the primer  
177 pairs between 50-60°C (‘`MinTm = 50.0`, `MinTmWithMismatchesAllowed = 58.0`,  
178 `SuggestedMaxTm = 60.0`’), and we set the maximum number of primer pairs per alignment to  
179 six (note: only settings different from the PRiFi default are mentioned above). The program  
180 PRiFi was originally developed to design intron-spanning markers (but see Fredslund et al.  
181 2005). Here we use it because it enables primer design based on MSA input. Parameters for  
182 PRiFi can be specified in the DISCOMARK configuration file (‘`discomark.conf`’).

183 *6. Check marker specificity.* To ensure the specificity of the designed primer pairs, we  
184 compare their sequences against the NCBI database (‘`refseq_mrna`’). Primer sequences are  
185 searched in the NCBI database (‘`refseq_mrna`’) using the online BLASTN interface. The  
186 default search settings are restricted to human and bacterial targets using the Entrez query



187 ‘txid2[ORGN] OR txid9606[ORGN]’ because these are most likely to be present as  
188 contaminants in sequencing libraries. The result hits of the BLAST search are indicated to the  
189 user in the HTML output.

190 *7. Visualize results.* As final step, the program produces a HTML report containing the list of  
191 designed primers, an alignment viewer and plots visualizing the discovered set of markers  
192 (Fig. 2). Besides the primer sequences the report lists several features such as the melting  
193 temperatures, predicted sequence length, and the number of taxa amplified by each primer set  
194 (Fig. 2a). Selected primer pairs and primer lists can be downloaded as FASTA or CSV files,  
195 respectively. The report highlights the species coverage achieved by each discovered marker,  
196 i.e. how many species’ sequences each primer set is expected to amplify, as an estimate of  
197 how universally each primer set can be applied. An identification of uniqueness within the  
198 reference genome (as an estimator of single-copy status) is given within the flag ‘uref’,  
199 starting whether all sequences belonging to a marker had their best BLAST hit to the same  
200 reference sequence. Additionally, functional annotations are reported, if available, to guide  
201 the user in the selection of markers of interest. Annotations can be supplied in form of a tab-  
202 delimited file with the ‘-a’ option. In principle, any kind of annotations can be used depending  
203 on the desired research objective. In our usage scenarios, we used gene ontology (GO) terms  
204 which were retrieved by mapping the gene IDs contained in the HAMSTR core ortholog set  
205 via the UniProt website (<http://www.uniprot.org/>, last accessed December 20, 2015).  
206 Common input ortholog sequences are visualized (Fig. 2b). In order to provide a measure of  
207 the suitability of the markers for phylogenetic reconstruction the program calculates the  
208 number of SNPs between a primer pair by comparing the aligned input sequences against  
209 each other. The number of SNPs between each primer pair is visualized in relation to the  
210 estimated product length (Fig. 2c) and reported in the tabular output.

211 *Usage cases*

212 *Closely related species - Cloeon dipterum s.l. species complex.* To test the suitability of  
213 DISCOMARK for closely related species, we designed primer pairs for the species complex of  
214 *C. dipterum* s.l. (Ephemeroptera: Baetidae). The species complex consists of several closely  
215 related species, including *Cloeon peregrinator* GATTOLLIAT & SARTORI, 2008 from Madeira  
216 (Gattolliat *et al.* 2008; Rutschmann *et al.* 2014). As input to design the primer pairs, we used  
217 whole-genome sequencing data of *C. dipterum* L. 1761 and expressed sequence tags (EST) of  
218 *Baetis* sp. (Table 1). The sequence reads of *C. dipterum* were trimmed and *de novo* assembled  
219 using NEWBLER v.2.5.3 (454 Life Science Corporation) under the default settings for large  
220 datasets. Ortholog sequences prediction of both data sets was performed with HAMSTR v.9  
221 using the insecta\_hmmer3-2 core reference taxa set ([http://www.deep-](http://www.deep-phylogeny.org/hamstr/download/datasets/hmmer3/insecta_hmmer3-2.tar.gz)  
222 [phylogeny.org/hamstr/download/datasets/hmmer3/insecta\\_hmmer3-2.tar.gz](http://www.deep-phylogeny.org/hamstr/download/datasets/hmmer3/insecta_hmmer3-2.tar.gz), last accessed  
223 December 20, 2015), including 1,579 orthologous genes. We ran the program DISCOMARK  
224 with default settings ('python run\_project.py -i input/Cloeon -i input/Baetis -r  
225 input/reference/Cloeon.fa -a input/co2go.ixosc.csv -d output/cloeon\_baetis'), using the  
226 predicted orthologs from HAMSTR and the whole-genome *Cloeon*-data as reference (step 4).  
227 For comparison, we also ran DISCOMARK without a reference and also present these results.  
228 The Pearson correlation between the number of SNPs located between primer pairs and  
229 corresponding estimated product length was calculated using the function cor within the stats  
230 package for R (R Development Core Team, 2016). A t-test for significance was performed  
231 using the function cor.test.

232 From the total of designed primer pairs (78 markers, 445 primer pairs, see results) we  
233 selected eight and amplified them for four species of the *C. dipterum* species complex (Table

234 1) in the laboratory. The eight markers were manually selected based on the following  
235 criteria: best alignment (i.e. EPIC markers), longest product length, and most species covered.  
236 We used standardized polymerase chain reactions (PCR; 35-40 PCR cycles with annealing  
237 temperature of 55°C), followed by Sanger sequencing. Forward and reverse sequences were  
238 assembled and edited with GENEIOUS R7 v.7.1.3 (Biomatters Ltd.), indicating ambiguous  
239 positions following the IUPAC nucleotide codes. Sequences containing heterozygous indels  
240 (i.e. alleles with length polymorphisms) were phased with CODONCODEALIGNER v.3.5.6  
241 (CodonCode Corporation). For this we used the implemented ‘Split Heterozygous Indels’  
242 function. Multiple sequence alignments were created for all sequences for each marker. The  
243 predicted orthologous sequences of *Baetis* sp. were used as reference to infer the exon-intron  
244 splicing boundaries (canonical and non-canonical splice site pairs). The final sequence  
245 alignments were checked for the occurrence of stop codons and indels, and split into exon and  
246 intron parts using a custom Python script ([https://github.com/srutschmann/python\\_scripts](https://github.com/srutschmann/python_scripts), last  
247 accessed March 28, 2016). Sequence alignments were phased using the program PHASE  
248 v.2.1.1 (Stephens *et al.* 2001; Stephens and Donnelly 2003) with a cutoff value of 0.6  
249 (Harrigan *et al.* 2008; Garrick *et al.* 2010), whereby input and output files were formatted  
250 using the Perl scripts included in SEQPHASE (Flot 2010). Heterozygous sites that could not  
251 be resolved were coded as ambiguity codes for subsequent analyses. After phasing, all  
252 alignments were re-aligned with MAFFT. The number of variable and informative sites, and  
253 the nucleotide diversity per exon alignment was calculated with a custom script.

254 To investigate the heterogeneity of each marker’s DNA sequences, we reconstructed  
255 haplotype networks, using FITCHI (Matschiner 2016). As input for each marker we inferred a  
256 gene tree using the program RAXML v.8 (Stamatakis 2014) with the GTRCAT model and  
257 1,000 bootstrap replicates under the rapid bootstrap algorithm. The phylogenetic relationships

258 were calculated with Bayesian inference, using MRBAYES v.3.2.3 (Ronquist *et al.* 2012) based  
259 on a concatenated nDNA matrix that consisted of the exon sequences from all 15 nDNA  
260 markers. The best-fitting model of molecular evolution for each sequence alignment was  
261 selected via a BIC criterion in JMODELTEST v.2.1 (Guindon and Gascuel 2003; Darriba *et al.*  
262 2012). We calculated  $10^6$  generations with random seed, a burn-in of 25% and four MCMC  
263 chains. As an outgroup we used the predicted orthologous sequences of *Baetis* sp..

264 *Distantly related species - insect order Ephemeroptera.* In this test case, we used contigs  
265 derived from whole-genome sequencing projects of the species *Baetis* sp., *Ephemera danica*  
266 MÜLLER 1764, *Eurylophella* sp., and *Isonychia bicolor* WALKER 1853 (Table 1). The contigs  
267 from each species were used for ortholog predicting with HAMSTR v.13.2.4  
268 (<http://sourceforge.net/projects/hamstr/files/hamstr.v13.2.4.tar.gz>, last accessed December 20,  
269 2015). We ran DISCOMARK with the default settings twice. For the first run, we used the  
270 *Baetis* sp. data as reference ('python run\_project.py -i input/Baetis -i input/Ephemera -i  
271 input/Eurylophella -i input/Isonychia -r input/reference/Baetis.fa -a input/co2go.ixosc.csv -d  
272 output/mayflies'). The second run was performed without a reference ('python run\_project.py  
273 -i input/Baetis -i input/Ephemera -i input/Eurylophella -i input/Isonychia -a  
274 input/co2go.ixosc.csv -d output/mayflies\_without\_reference').

## 275 **Results**

276 *Closely related species - species complex of Cloeon dipterum s.l.*

277 Using a reference, DISCOMARK identified 78 nDNA markers with 445 primer pairs for  
278 orthologous sequences of both species (*Baetis* sp. and *C. dipterum* s.l.). Ortholog prediction  
279 yielded 403 orthologous sequences for the *Baetis* sp. EST-data and 1,211 for *C. dipterum*. For

280 the individual species, DISCOMARK identified 793 markers for *C. dipterum* and 123 for *Baetis*  
281 sp. Markers including both species were between 200 and 931 bp with median length of 412  
282 bp long. Their number of SNPs per marker ranged from zero to 82 (median: five) with an  
283 average of one SNP per 68 bp. Marker length and number of SNPs of the common markers  
284 were correlated with a Pearson's correlation coefficient of 0.28 (Pearson's product-moment  
285 correlation  $P < 0.001$ ). Without using a reference, DISCOMARK identified 73 markers with  
286 460 primer pairs for orthologous sequences of both species. The total run time for this data set  
287 on a local Linux machine (quad-core Intel i5, 8 GB RAM) was  $< 30$  min.

288 The haplotype networks based on the eight selected markers showed a clear structure for  
289 all markers, including two markers with shared haplotypes for the two species from the U.S.  
290 and Madeira (Fig. 3 and Fig. S1, Supporting information). The length of the concatenated  
291 sequence alignment of the eight markers was 3,530 bp (2,526 bp exon sequence, Table S1,  
292 Supporting information). The exon sequence matrix contained 78 variable sites, 27  
293 informative sites, and was 92.6% complete. The nucleotide diversity ranged between 0.009  
294 and 0.028 (median: 0.013). Phylogenetic tree reconstruction based on these eight markers  
295 resulted in a phylogeny with fully resolved nodes (Bayesian posterior probability (PP)  $\geq 95\%$ ;  
296 Fig. 3a).

297 The species *C. dipterum* sp1 was found as outgroup to a clade containing the species *C.*  
298 *dipterum* sp2 from Switzerland and the two species from the U.S and Madeira. The latter two  
299 species formed a monophyletic clade. The use of the marker set for *C. dipterum* developed  
300 here resulted in a fully resolved phylogenetic tree in contrast to the mitochondrial tree of  
301 Rutschmann *et al.* (2014). The phylogeny of the *Cloeon*-species complex presented here also

302 is in complete agreement with species tree reconstructions based on 59 nuclear DNA markers  
303 (Rutschmann *et al.*, submitted).

#### 304 *Distantly related species - insect order Ephemeroptera*

305 In total, we found 23 orthologs with a total of 53 primer pairs for all four species (Table S2,  
306 Supporting information) for the first run with a reference. The input files per species (i.e.  
307 putative orthologous sequences) ranged from 1,445 to 1,523. We detected 38 markers that  
308 covered three of the species (99 primer pairs), 81 markers covering two species (258 primer  
309 pairs), and 118 markers that covered any single species (684 primer pairs). For the individual  
310 species, *Baetis* sp. had the most markers available (209) of the single- and multi-species  
311 markers. There were 136 markers for *Eurylophella* sp., 104 markers for *I. bicolor*, and 87  
312 markers for *E. danica*. The lengths for all markers covering all four species varied between  
313 207 and 997 bp with median of 517 bp, containing between 39 and 298 SNPs per marker with  
314 a SNP every four bp on average. Marker length and number of SNPs were correlated with a  
315 Pearson's correlation coefficient of 0.96 (Pearson's product-moment correlation  $P < 0.001$ ).  
316 Without a reference, DISCOMARK identified 25 orthologs with 66 primer pairs for all four  
317 species. Run time for this data set on a Linux client (quad-core Intel i5, 8 GB RAM) was < 50  
318 min.

#### 319 **Discussion**

320 DISCOMARK is the first stand-alone program of which we are aware that discovers putative  
321 single-copy nDNA markers and designs primer pairs based on multiple sequence alignments  
322 on a genome-wide scale. The visual output gives guidance on the suitability of each marker  
323 i.e. variability within and between species measured as number of SNPs, and information

324 about the included species of each marker. Using this approach, primers can be specifically  
325 chosen to match the ‘phylogenetic resolution’, i.e. many markers with intermediate number of  
326 SNPs for closely related species, and fewer markers with generally higher number of SNPs  
327 for distantly related species can be selected. The automatic processing, including combining,  
328 aligning, trimming and blasting sequences of any nucleotide FASTA sequences together with  
329 the produced graphical output significantly facilitate the design of primer pairs for a large  
330 number of nDNA markers. Nevertheless, users retain a high degree of flexibility by the  
331 stepwise nature of the workflow. DISCOMARK is free, open-source software to assist the  
332 development of markers for non-model species on the genome scale. We demonstrated the  
333 efficacy of our approach for closely related species as well as for members of divergent  
334 families within an order of insects. Using a reference genome enabled resolution of intron-  
335 exon boundaries but is not a strict requirement for marker design. We strongly recommend  
336 carefully checking the selected primer pairs in the alignment viewer. The performance of  
337 DISCOMARK will largely depend on the properties of your input data (i.e. fidelity of ortholog  
338 prediction, genome complexity, divergence of species.)

### 339 *Marker development within the order Ephemeroptera*

340 The usage of DISCOMARK added an extensive set of new potential nDNA markers to the ones  
341 that have been used to date for mayfly (Ephemeroptera) phylogenies based on few individual  
342 genes (histone 3, elongation factor 1 alpha, phosphoenolpyruvate carboxykinase (Vuataz *et al.*  
343 2011; Pereira-da-Conceicao *et al.* 2012; Vuataz *et al.* 2013)). Most recent tree reconstructions  
344 remain based on mitochondrial DNA markers (e.g. Rutschmann *et al.* 2014 (used three  
345 mitochondrial genes); Leys *et al.* 2016 (used cytochrome *c* oxidase subunit 1 (*cox1*) gene)).  
346 With DISCOMARK, the availability of more genome data will increase the number of markers

347 suitable for phylogenetic studies. This will promote more fine-scale phylogenetic studies,  
348 which are needed to resolve more recent evolutionary events and the phylogenetic  
349 relationships of morphologically cryptic species that can not be resolved with standard  
350 markers (Dijkstra *et al.* 2014).

## 351 **Acknowledgements**

352 We thank Katrin Preuß and Susan Mbedi for their help with genome sequencing, and to our  
353 research groups, in particular to David Posada and Sara Rocha, and to Eric Coissac and three  
354 anonymous reviewers for constructive comments that improved the quality of this project.  
355 Research was partially supported by the Leibniz Association (PAKT für Forschung und  
356 Innovation “FREDIE” project), the Swiss National Science Foundation (Early  
357 PostDoc.Mobility grant P2SKP3\_15869 to S.R.), and a visiting fellowship from the Japan  
358 Association for the Advancement of Science (L-15543 to M.T.M.). This is publication  
359 number 39 of the Berlin Center for Genomics in Biodiversity Research.

## 360 **References**

- 361 Altschul SF, Madden TL, Schaffer AA *et al.* (1997) Gapped BLAST and PSI-BLAST: a new  
362 generation of protein database search programs. *Nucleic Acids Research*, **25**, 3389-3402.
- 363 Baird NA, Etter PD, Atwood TS *et al.* (2008) Rapid SNP Discovery and Genetic Mapping  
364 Using Sequenced RAD Markers. *PLoS ONE*, **3**, e3376.
- 365 Brodin J, Krishnamoorthy M, Athreya G *et al.* (2013) A multiple-alignment based primer  
366 design algorithm for genetically highly variable DNA targets. *BMC Bioinformatics*, **14**,  
367 255.
- 368 Camacho C, Coulouris G, Avagyan V *et al.* (2009) BLAST+: architecture and applications.  
369 *BMC Bioinformatics*, **10**, 421.
- 370 Capella-Gutierrez S, Silla-Martinez JM, Gabaldon T (2009) trimAl: a tool for automated  
371 alignment trimming in large-scale phylogenetic analyses. *Bioinformatics*, **25**, 1972-1973.
- 372 Castresana J (2000) Selection of conserved blocks from multiple alignments for their use in  
373 phylogenetic analysis. *Molecular Biology and Evolution*, **17**, 540-552.
- 374 Chamala S, García N, Godden GT *et al.* (2015) MarkerMiner 1.0: new application for  
375 phylogenetic marker development using angiosperm transcriptomes. *Applications in Plant  
376 Sciences*, **4**, 1400115.



- 377 Dijkstra KD, Monaghan MT, Pauls SU (2014) Freshwater biodiversity and aquatic insect  
378 diversification. *Annual Review of Entomology*, **59**, 143-163.
- 379 Darriba D, Taboada GL, Doallo R, Posada D (2012) jModelTest 2: more models, new  
380 heuristics and parallel computing. *Nature Methods*, **9**, 772.
- 381 Ebersberger I, Strauss S, von Haeseler A (2009) HaMStR: profile hidden markov model  
382 based search for orthologs in ESTs. *BMC Evolutionary Biology*, **9**, 157.
- 383 Ellegren H (2014) Genome sequencing and population genomics in non-model organisms.  
384 *Trends in Ecology & Evolution*, **29**, 51-63.
- 385 Elshire RJ, Glaubitz JC, Sun Q *et al.* (2011) A robust, simple genotyping-by-sequencing  
386 (GBS) approach for high diversity species. *PLoS ONE*, **6**, e19379.
- 387 Faircloth BC, McCormack JE, Crawford NG *et al.* (2012) Ultraconserved elements anchor  
388 thousands of genetic markers spanning multiple evolutionary timescales. *Systematic  
389 Biology*, **61**, 717-726.
- 390 Flot J-F (2010) seqphase: a web tool for interconverting phase input/output files and fasta  
391 sequence alignments. *Molecular Ecology Resources*, **10**, 162-166.
- 392 Fredslund J, Schauser L, Madsen LH, Sandal N, Stougaard J (2005) PriFi: using a multiple  
393 alignment of related sequences to find primers for amplification of homologs. *Nucleic  
394 Acids Research*, **33**, W516-520.
- 395 Garrick RC, Sunnucks P, Dyer RJ (2010) Nuclear gene phylogeography using PHASE:  
396 dealing with unresolved genotypes, lost alleles, and systematic bias in parameter  
397 estimation. *BMC Evolutionary Biology*, **10**, 118.
- 398 Gattolliat J-L, Hugher SJ, Monaghan MT, Sartori M (2008) Revision of Mdeiran mayflies  
399 (Insecta, Ephemeroptera). *Zootaxa*, **1957**, 69-80.
- 400 Guindon S, Gascuel O (2003) A simple, fast, and accurate algorithm to estimate large  
401 phylogenies by maximum likelihood. *Systematic Biology*, **52**, 696-704.
- 402 Harrigan RJ, Mazza ME, Sorenson MD (2008) Computation vs. cloning: evaluation of two  
403 methods for haplotype determination. *Molecular Ecology Resources*, **8**, 1239-1248.
- 404 Katoh K, Standley DM (2013) MAFFT multiple sequence alignment software version 7:  
405 improvements in performance and usability. *Molecular Biology and Evolution*, **30**, 772-  
406 780.
- 407 Kerr KCR, Cloutier A, Baker AJ (2014) One hundred new universal exonic markers for birds  
408 developed from a genomic pipeline. *Journal of Ornithology*, **155**, 561-569.
- 409 Landan G, Graur D (2008) Local reliability measures from sets of co-optimal multiple  
410 sequence alignments. *Pacific Symposium on Biocomputing*, 15-24.
- 411 Lane CE, Hulgán D, O'Quinn K, Benton MG (2015) CEMAsuite: open source degenerate  
412 PCR primer design. *Bioinformatics*, **31**, 3688-3690.
- 413 Lemmon AR, Lemmon EM (2012) High-throughput identification of informative nuclear loci  
414 for shallow-scale phylogenetics and phylogeography. *Systematic Biology*, **61**, 745-761.
- 415 Leys M, Keller I, Räsänen K, Gattolliat J-L, Robinson CT (2016) Distribution and population  
416 genetic variation of cryptic species of the Alpine mayfly *Baetis alpinus* (Ephemeroptera:  
417 Baetidae) in the Central Alps. *BMC Evolutionary Biology*, **16**:77.
- 418 Matschiner M (2016) Fitchi: haplotype genealogy graphs based on the Fitch algorithm.  
419 *Bioinformatics*, **32**, 1250-1252.
- 420 Meyer BS, Matschiner M, Salzburger W (2015) A tribal level phylogeny of Lake Tanganyika  
421 cichlid fishes based on a genomic multi-marker approach. *Molecular Phylogenetics and  
422 Evolution*, **83**, 56-71.

- 423 Morkovsky L, Paces J, Ridl J, Reifova R (2015) Scrimmer: designing primers from  
424 transcriptome data. *Molecular Ecology Resources*, **15**, 1415-1420.
- 425 Near TJ, Eytan RI, Dornburg A, Kuhn KL, Moore JA *et al.* (2012) Resolution of ray-finned  
426 fish phylogeny and timing of diversification. *Proceedings of the National Academy of  
427 Sciences*, **109**, 13698-13703.
- 428 O'Halloran DM (2015) PrimerView: high-throughput primer design and visualization. *Source  
429 Code for Biology and Medicine*, **10**, 8.
- 430 Pais FS, Ruy Pde C, Oliveira G, Coimbra RS (2014) Assessing the efficiency of multiple  
431 sequence alignment programs. *Algorithms for Molecular Biology*, **9**, 4.
- 432 Pereira-da-Conceicao LL, Price BW, Barber-James HM, Barker NP, de Moor FC *et al.* (2012)  
433 Cryptic variation in an ecological indicator organism: mitochondrial and nuclear DNA  
434 sequence data confirm distinct lineages of *Baetis harrisoni* Barnard (Ephemeroptera:  
435 Baetidae) in southern Africa. *BMC Evolutionary Biology*, **12**, 26.
- 436 R Core Team (2016) *R: A Language and Environment for Statistical Computing*. R  
437 Foundation for Statistical Computing, Vienna, Austria. ISBN 3-900051-07-0, available at:  
438 <https://www.R-project.org> (last accessed 26 March 2016).
- 439 Ramirez-Gonzalez RH, Uauy C, Caccamo M (2015) PolyMarker: A fast polyploid primer  
440 design pipeline. *Bioinformatics*, **31**, 2038-2039.
- 441 Ronquist F, Teslenko M, van der Mark P, Ayres DL, Darling A *et al.* (2012) MrBayes 3.2:  
442 efficient Bayesian phylogenetic inference and model choice across a large model space.  
443 *Systematic Biology*, **61**, 539-542.
- 444 Ruane S, Bryson RW, Jr., Pyron RA, Burbrink FT (2014) Coalescent species delimitation in  
445 milksnakes (genus *Lampropeltis*) and impacts on phylogenetic comparative analyses.  
446 *Systematic Biology*, **63**, 231-250.
- 447 Rutschmann S, Gattolliat JL, Hughes SJ, Báez M, Sartori M *et al.* (2014) Evolution and island  
448 endemism of morphologically cryptic *Baetis* and *Cloeon* species (Ephemeroptera,  
449 Baetidae) on the Canary Islands and Madeira. *Freshwater Biology*, **59**, 2516-2527.
- 450 Sela I, Ashkenazy H, Katoh K, Pupko T (2015) GUIDANCE2: accurate detection of  
451 unreliable alignment regions accounting for the uncertainty of multiple parameters. *Nucleic  
452 Acids Research*, **43**, W7-14.
- 453 Sobhy H, Haitham S, Philippe C (2012) Gemi: PCR primers prediction from multiple  
454 alignments. *Comparative and Functional Genomics*, **2012**, 1-5.
- 455 Stamatakis A (2014) RAxML version 8: a tool for phylogenetic analysis and post-analysis of  
456 large phylogenies. *Bioinformatics*, **30**, 1312-1313.
- 457 Stephens M, Donnelly P (2003) A comparison of bayesian methods for haplotype  
458 reconstruction from population genotype data. *The American Journal of Human Genetics*,  
459 **73**, 1162-1169.
- 460 Stephens M, Smith NJ, Donnelly P (2001) A new statistical method for haplotype  
461 reconstruction from population data. *The American Journal of Human Genetics*, **68**, 978-  
462 989.
- 463 Szitenberg A, John M, Blaxter ML, Lunt DH (2015) ReproPhylo: An Environment for  
464 Reproducible Phylogenomics. *PLoS Computational Biology*, **11**, e1004447.
- 465 Talavera G, Castresana J (2007) Improvement of phylogenies after removing divergent and  
466 ambiguously aligned blocks from protein sequence alignments. *Systematic Biology*, **56**,  
467 564-577.
- 468 Untergasser A, Cutcutache I, Koressaar T *et al.* (2012) Primer3—new capabilities and  
469 interfaces. *Nucleic Acids Research*, **40**, e115.

- 470 Vuataz L, Sartori M, Gattolliat JL, Monaghan MT (2013) Endemism and diversification in  
471 freshwater insects of Madagascar revealed by coalescent and phylogenetic analysis of  
472 museum and field collections. *Molecular Phylogenetics and Evolution*, **66**, 979-991.
- 473 Vuataz L, Sartori M, Wagner A, Monaghan MT (2011) Toward a DNA taxonomy of Alpine  
474 *Rhithrogena* (Ephemeroptera: Heptageniidae) using a mixed Yule-coalescent analysis of  
475 mitochondrial and nuclear DNA. *PLoS ONE*, **6**, e19728.
- 476 Yoon H, Leitner T (2015) PrimerDesign-M: a multiple-alignment based multiple-primer  
477 design tool for walking across variable genomes. *Bioinformatics*, **31**, 1472-1474.
- 478 You FM, Huo N, Gu YQ, Luo MC, Ma Y *et al.* (2008) BatchPrimer3: a high throughput web  
479 application for PCR and sequencing primer design. *BMC Bioinformatics*, **9**, 253.
- 480 Yu L, Barakat E, Di Francesco J, Herzig HP (2015) Two-dimensional polymer grating and  
481 prism on Bloch surface waves platform. *Optics Express*, **23**, 31640-31647.
- 482 Zeng L, Zhang Q, Sun R, Kong H, Zhang N *et al.* (2014) Resolution of deep angiosperm  
483 phylogeny using conserved nuclear genes and estimates of early divergence times. *Nature*  
484 *Communications*, **5**, 4956.

485 **Data Accessibility**

486 The program, user manual and example data sets are freely available at:  
487 <https://github.com/hdetering/discomark> (last accessed March 28, 2016). Scripts used for the  
488 analyses are available at: [https://github.com/srutschmann/python\\_scripts](https://github.com/srutschmann/python_scripts) (last accessed March  
489 28, 2016). All DNA sequences from this study are available under GenBank accessions:  
490 KU987258-KU987260, KU987265-KU987268, KU987273-KU987276, KU987285-  
491 KU987288. GenBank accession numbers for sequences included in previous studies are the  
492 following: KU971838-KU971840, KU971851, KU972090-KU972092, KU972104,  
493 KU972490-KU972492, KU972503, KU973060-KU973061, KU973074. Sequence  
494 alignments and tree files are available at the Dryad repository ([doi.org/10.5061/dryad.9sf96](https://doi.org/10.5061/dryad.9sf96)).

495 **Author Contributions**

496 S.R., H.D., and M.T.M. conceived the study. S.R. coordinated the project and performed the  
497 empirical work. S.R. and H.D. designed the program. H.D. implemented the program. S.R.,  
498 H.D., and M.T.M wrote the manuscript. S.S. gave guidance for the ortholog prediction. J.F.  
499 provided the code of the PRiFi web tool. All authors provided comments and approved the  
500 final manuscript.  
501

502 **Tables**

503 **Table 1** List of species used for the usage examples of the closely related species (*Cloeon*  
 504 *diptherum* s.l. species complex), and the distantly related species (insect order Ephemeroptera).  
 505 Voucher number, geographic origin, and GenBank accession numbers of cytochrome *c*  
 506 oxidase subunit 1 (*cox1*) gene are given for the specimens used for the marker amplification.  
 507 GenBank accession numbers of the genome data and the number of putative orthologs are  
 508 given for the species used to run DISCOMARK. For both data sets species used as reference are  
 509 indicated with \*.

510

| <b>Species<br/>(Voucher, Origin)</b>                  | <b>Family</b>  | <b>Acc. Number</b>    | <b>Orthologs</b> |
|-------------------------------------------------------|----------------|-----------------------|------------------|
| <i>Closely related species</i>                        |                |                       |                  |
| <i>Baetis</i> sp.                                     | Baetidae       | FN198828-<br>FN203024 | 403              |
| <i>Cloeon diptherum</i> *                             | Baetidae       | PRJNA268073           | 1,211            |
| <i>Cloeon diptherum</i> sp1<br>(SR21B07, Switzerland) | Baetidae       | KJ631626              | -                |
| <i>Cloeon diptherum</i> sp2<br>(SR21B06, Switzerland) | Baetidae       | KJ631625              | -                |
| <i>Cloeon diptherum</i> sp3<br>(US, U.S.)             | Baetidae       | KU757184              | -                |
| <i>Cloeon peregrinator</i><br>(SR23A10, Madeira)      | Baetidae       | KU757122              | -                |
| <i>Distantly related species</i>                      |                |                       |                  |
| <i>Baetis</i> sp.*                                    | Baetidae       | PRJNA219528           | 1,518            |
| <i>Ephemera danica</i>                                | Ephemeridae    | PRJNA219552           | 1,445            |
| <i>Eurylophella</i> sp.                               | Ephemerellidae | PRJNA219556           | 1,523            |
| <i>Isonychia bicolor</i>                              | Isonychiidae   | PRJNA219568           | 1,457            |

511

512 **Figure legends**

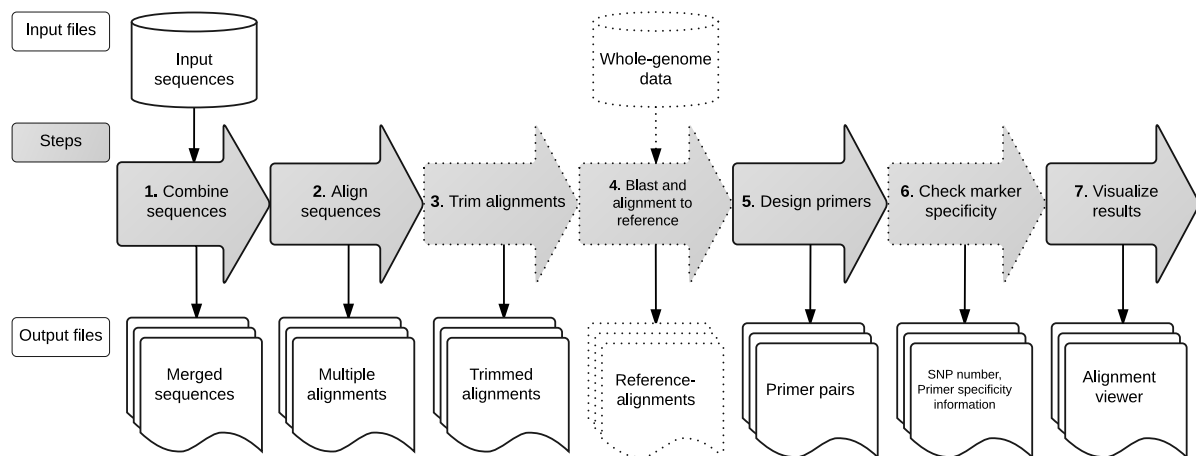

513

514 **Fig. 1** Overview of the DISCOMARK workflow and processing steps. Arrows with a broken  
515 outline indicate optional steps (for details see Materials and Methods section).

(a)

| export | primerSet | species | snp | product | uref | fw sequence           | rv sequence          | Tm        | primer length | fw BLAST hit | rv BLAST hit | annotation                                                                       |
|--------|-----------|---------|-----|---------|------|-----------------------|----------------------|-----------|---------------|--------------|--------------|----------------------------------------------------------------------------------|
| 413338 |           |         |     |         |      |                       |                      |           |               |              |              |                                                                                  |
|        | 413338_1  | 2       | 13  | 469     |      | CAATTTGAAACGGGAGATCCG | GGAACCTTCARGTCCTCAGC | 59.9/59.9 | 22/20         | None         | None         | GO:0003743<br>GO:0003746<br>GO:0006452<br>GO:0043022<br>GO:0045901<br>GO:0045905 |
|        | 413338_2  | 2       | 11  | 421     |      | CAATTTGAAACGGGAGATCCG | AGGTAACGTCATCAGAGATG | 59.9/59.4 | 22/21         | None         | XM_017025767 | GO:0003743<br>GO:0003746<br>GO:0006452<br>GO:0043022<br>GO:0045901<br>GO:0045905 |

**primer table:**  
review primer pair sequences and attributes like product length, number of species covered, amplified SNPs, etc.

Alignment for locus 413338

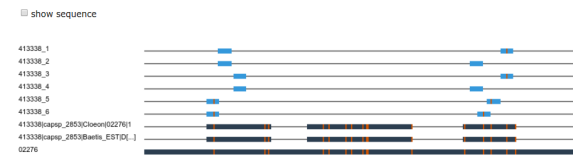

**alignment viewer:**  
review primer pair location within locus alignment; SNPs are highlighted; if a reference was provided, likely intron locations can be observed

(b)

Input files per species

| ID | Species    | #Input files |
|----|------------|--------------|
| A  | Cloeon     | 1211         |
| B  | Baetis_EST | 403          |

**Table 1:** Number of sequence files for each species contained in the input of this run.

**input loci table:**  
indicates the number of putative orthologs for each species in the input data set

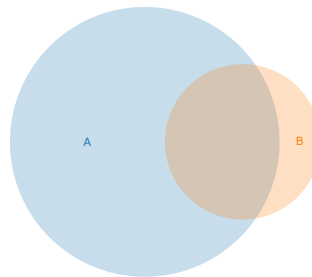

**locus overlap graph:**  
the number of input loci (putative orthologs) serves as a first indicator of relatedness between input species

**Figure 1:** Overlap of input sequences (e.g., orthologous groups) with respect to species. Higher overlap increases

(c)

Species overlap for identified markers

| #Species | #Orthologs | #PrimerPairs |
|----------|------------|--------------|
| 1        | 755        | 3798         |
| 2        | 77         | 338          |

**Table 2:** Grouping candidate markers (e.g., orthologous group of sequences) and primer pairs by the number of species that they cover.

Discovered markers by species

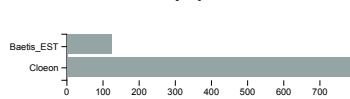

**Figure 2:** Number of markers that cover each species. Markers covering multiple species are included in the count for each of them.

Marker length vs. SNP count

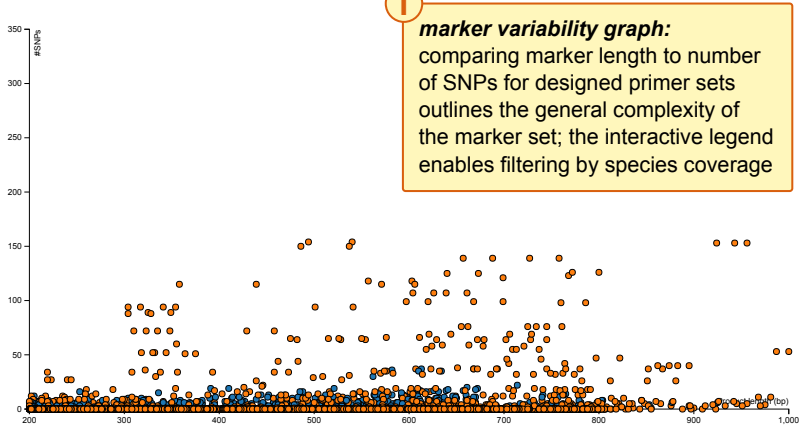

**marker variability graph:**  
comparing marker length to number of SNPs for designed primer sets outlines the general complexity of the marker set; the interactive legend enables filtering by species coverage

516

517 **Fig. 2** Schematic visualization of DISCOMARK HTML output, (a), overview of designed  
518 primers and view of alignment, including suggested primer pairs, (b), overview of provided  
519 input files, including a graph with common putative orthologous sequences, (c) information  
520 about the output, including identified markers, discovered markers per species, and scatter  
521 plot displaying the number of single nucleotide polymorphisms (SNPs) versus product length  
522 for each primer pair.

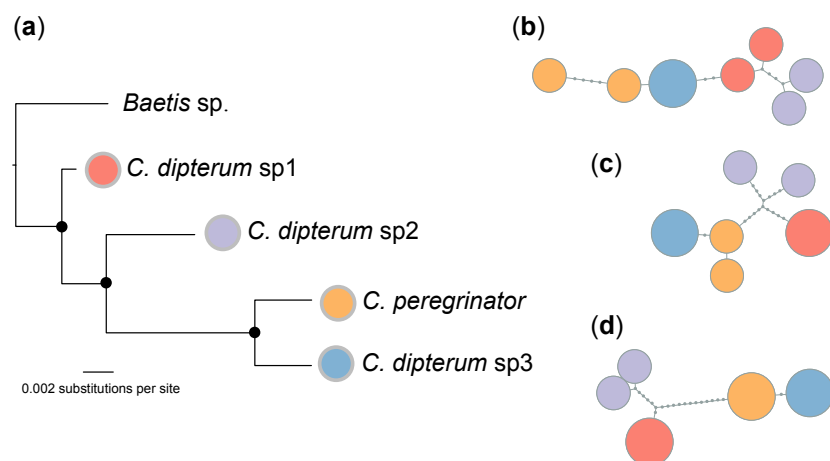

523

524 **Fig. 3** Phylogenetic reconstruction and haplotype networks for the empirical data. (a),  
525 Phylogenetic reconstruction of four representatives of the species complex *Cloeon dipterum*  
526 s.l., including *C. peregrinator*, based on the exon sequences of the eight newly developed  
527 nuclear DNA markers (2,526 base pairs). Bayesian inference was used to reconstruct the tree  
528 based on the concatenated supermatrix alignment. Bayesian posterior probabilities  $\geq 95\%$  are  
529 indicated by filled circles. *Baetis* was used as an outgroup. Scale bar represents substitutions  
530 per site. (b-d), Haplotype networks of three amplified markers, (b), marker 412045, (c),  
531 marker 412741, (d), marker 412048 (full set of haplotype networks is available in Fig. S1,  
532 Supporting information). Circles are proportional to haplotype frequencies. Small circles  
533 along the branch indicate missing or unsampled haplotypes. Colors correspond to the four  
534 putative species.
